# Supplementary material for: CoMoO4and Ni1/3Co2/3MoO4nanosheets with high performance supercapacitor and nonenzymatic glucose detection properties
Source: Royal Society of Chemistry journal article supplement (doi:10.1039/c5ra13607e), 2015-01-01
Supplement: c5ra13607e1.pdf [file c5ra13607e1.pdf]

## Supporting Information

### CoMoO<sub>4</sub> and Ni<sub>1/3</sub>Co<sub>2/3</sub>MoO<sub>4</sub> nanosheets with high performance supercapacitor and nonenzymatic glucose detection

Jingchao Zhang, Renchun Zhang, Pingping Song, Jingli Zhao, Xueying Guo, Daojun Zhang\*, Baiqing Yuan\*

Surface analysis and chemical composition of the Ni<sub>1/3</sub>Co<sub>2/3</sub>MoO<sub>4</sub> nanosheets was performed by X-ray photoelectron spectroscopy using a VG ESCALAB 200R spectrometer using monochromatic Al K $\alpha$  radiation and an inductively coupled plasma atomic emission spectrometer (ICP-AES, IRIS Intrepid II XSP, ThermoFisher).

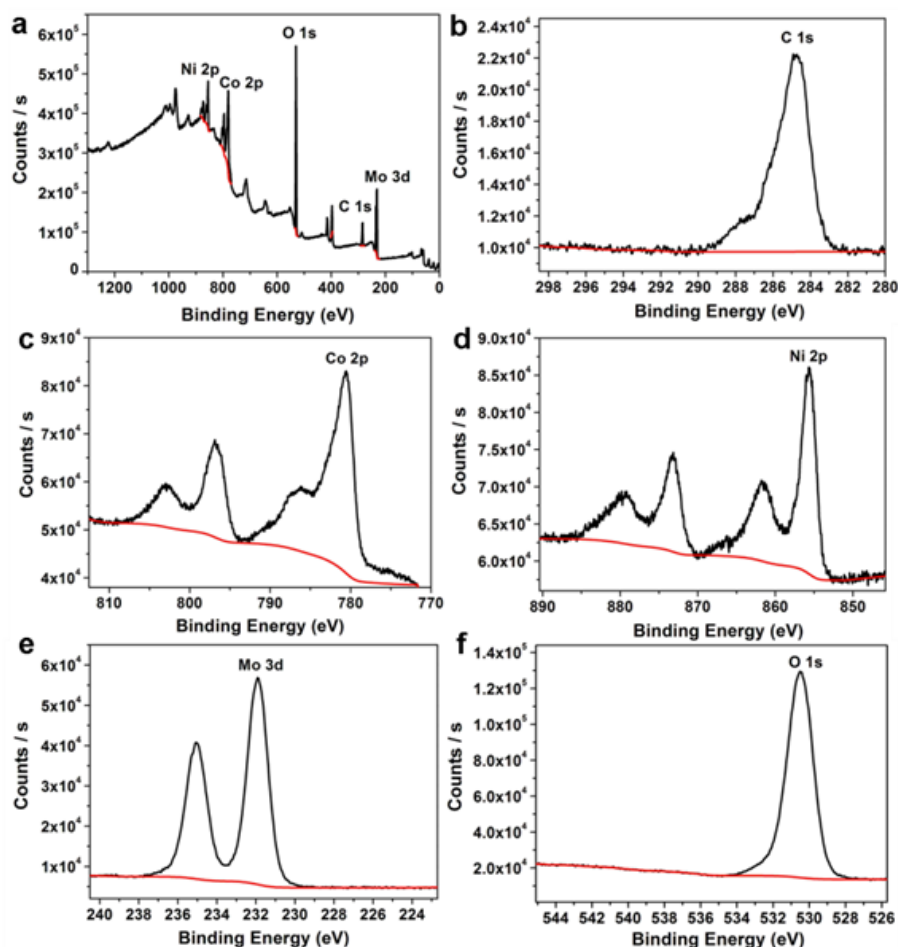

**Fig.S1** X-ray photoelectron (XPS) spectra of the Ni<sub>1/3</sub>Co<sub>2/3</sub>MoO<sub>4</sub> nanosheets: (a) survey spectrum, (b) C 1s, (c) Co 2p, (d) Ni 2p, (e) Mo 3d, and (f) O 1s.

**Table S1.** Quantitative analysis of Co and V contents by ICP-AES.

| Sample                                       | Co %  | Ni %  | Co/Ni mole ratio |
|----------------------------------------------|-------|-------|------------------|
| $\text{Ni}_{1/3}\text{Co}_{2/3}\text{MoO}_4$ | 26.61 | 13.73 | 1.93:1           |

The electrochemical impedance spectra were further studied in the revised manuscript. Electrochemical impedance spectroscopies were measured at open circuit potential with amplitude of 5 mV in a frequency range from 0.01 to 100 kHz. The Nyquist plots of  $\text{CoMoO}_4$  and  $\text{Ni}_{1/3}\text{Co}_{2/3}\text{MoO}_4$  nanosheets electrodes were shown in Fig.S2. In the low frequency region, the slope indicated the diffusion resistance for the two samples is almost the same. Furthermore, a small semicircle in the high frequency region indicated the nickel ions-doping endow the  $\text{Ni}_{1/3}\text{Co}_{2/3}\text{MoO}_4$  sample with a lower charge transfer resistance than the pure  $\text{CoMoO}_4$  sample, which was ascribed to the high electronic conductivity of the doped sample.

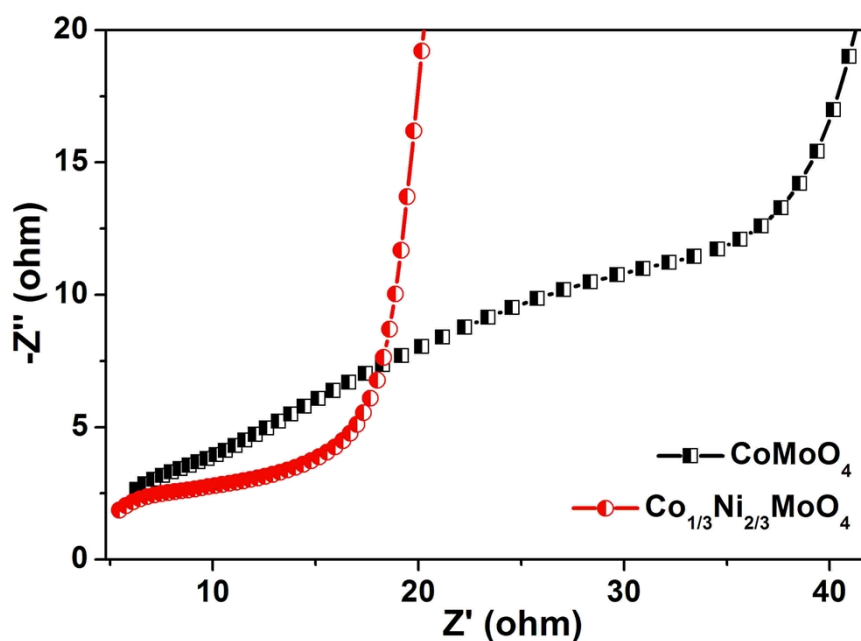

**Fig.S2** Electrochemical impedance spectra (EIS) of  $\text{CoMoO}_4$  and  $\text{Ni}_{1/3}\text{Co}_{2/3}\text{MoO}_4$  nanosheets electrodes.

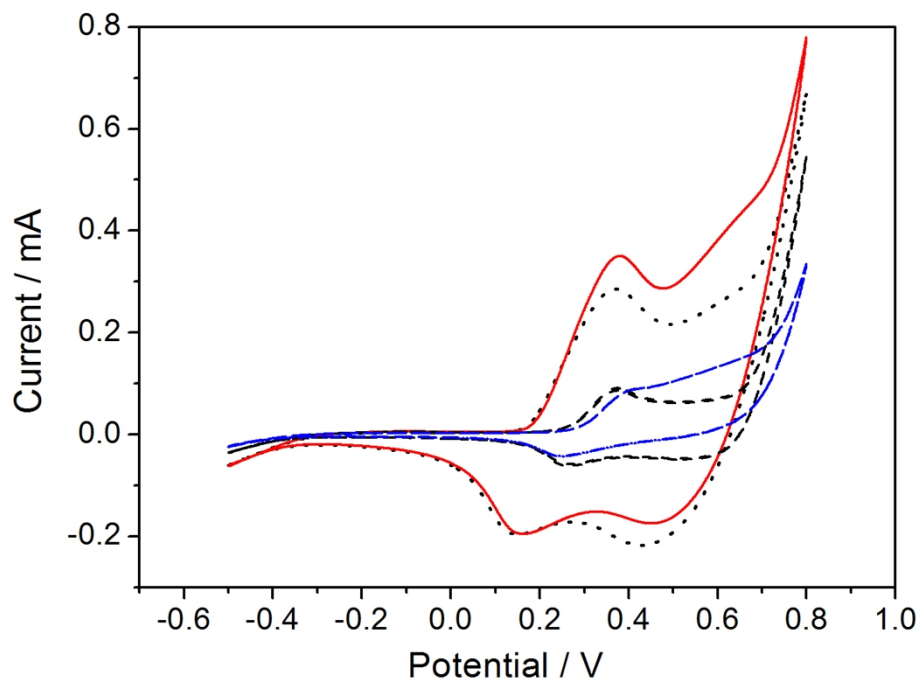

**Fig.S3** CV curves of  $\text{CoMoO}_4\text{-CPE}$  (dotted and solid lines) and  $\text{Ni}_{1/3}\text{Co}_{2/3}\text{MoO}_4\text{-CPE}$  (dashed and dash dotted lines) in the absence (dotted and dashed line) and presence (solid and dash dotted lines) of 5 mM glucose in 0.1 M NaOH.

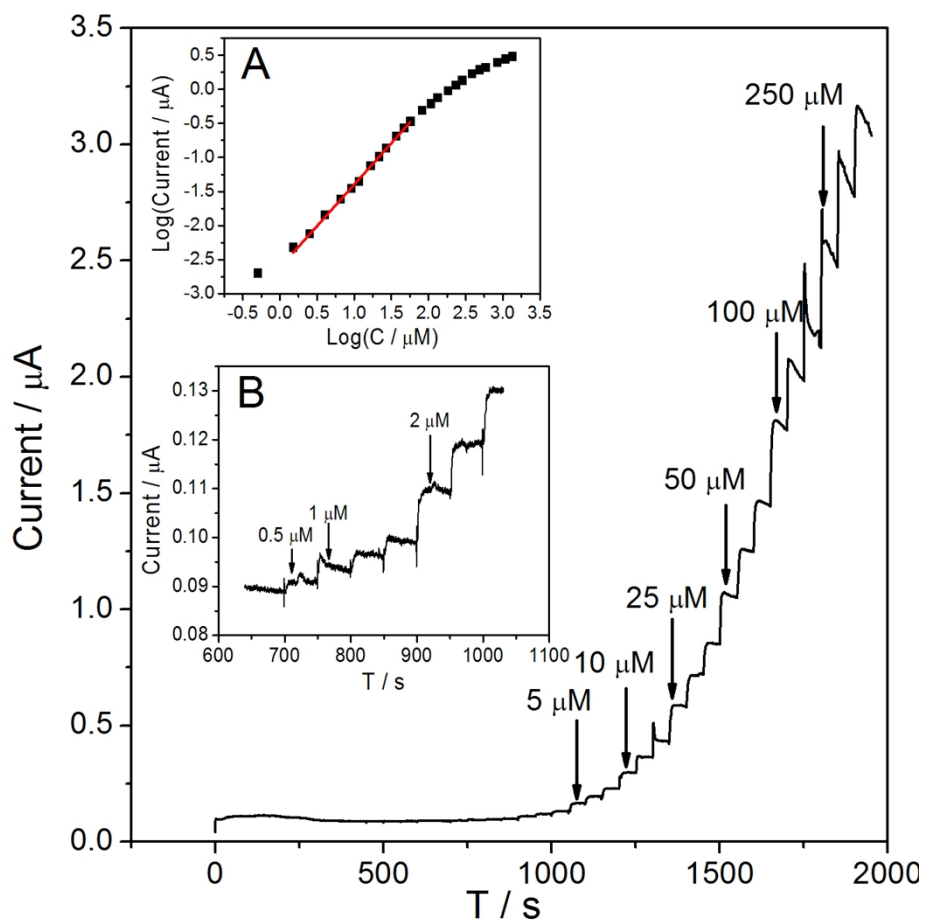

**Fig.S4** Amperometric sensing of glucose by successive addition of glucose for Ni<sub>1/3</sub>Co<sub>2/3</sub>MoO<sub>4</sub>-CPE at 0.4 V in 0.1 M NaOH. Inset: (A) Log-log plot of amperometric response versus the concentration of glucose; (B) Amperometric curve at low concentration of glucose.
